# Supplementary material for: A Damage-Independent Role for 53BP1 that Impacts Break Order and Igh Architecture during Class Switch Recombination
Source: PubMed Central journal article supplement — Cell Rep. Author manuscript; Available in PMC 2016 Jul 7. (PMC4927351; doi:10.1016/j.celrep.2016.05.073), 2016-06-16
Supplement: NIHMS790547-supplement-2.pdf [file NIHMS790547-supplement-2.pdf]

**Supplemental Tables:**

**Table S1. Percentage of cells expressing IgG1 as measured by FACS and by**

**metaphase-FISH analysis. Related to Figure 1** The increased frequency of switching identified by metaphases is likely related to the fact that some cells identified as switched might have only recombined the unrearranged V(D)J *Igh* allele. Cells with one or two C $\mu$  probes deleted were both classified as switched. Switching was measured after 72 hours of activation.

| <b>Genotype (n)</b>                | <b>FACS (%)</b> | <b>Metaphases (%)</b> |
|------------------------------------|-----------------|-----------------------|
| WT (9)                             | 19.9 ± 3.8      | 21.5 ± 10.5           |
| <i>Atm</i> <sup>-/-</sup> (2)      | 9.5 ± 2.1       | 14.0 ± 1.4            |
| <i>Trp53bp1</i> <sup>-/-</sup> (5) | 2.4 ± 0.6       | 6.5 ± 0.7             |
| <i>H2afx</i> <sup>-/-</sup> (2)    | 6.5 ± 2.1       | 8.5 ± 0.7             |
| WT+ATMi+PKi (2)                    | 10.5 ± 4.95     | 14.5 ± 2.12           |
| <i>Rif1</i> <sup>-/-</sup> (2)     | 5.0 ± 1.41      | 4.0 ± 1.41            |
| <i>Aicda</i> <sup>-/-</sup> (2)    | 0%              | 0%                    |

**Table S2. Chromosomal abnormalities upon activation. Related to Figure 1.**

Percentage represents the sum of chromosomal defects observed in each replicate divided by the total number of chromosomes 12 analyzed.

|                                      | <b>WT</b> |      |     | <b>WT+ATMi</b> |      |     | <b><i>Trp53bp1</i><sup>-/-</sup></b> |      |     | <b><i>Aicda</i><sup>-/-</sup></b> |      |     |
|--------------------------------------|-----------|------|-----|----------------|------|-----|--------------------------------------|------|-----|-----------------------------------|------|-----|
|                                      | rep1      | rep2 | %   | rep1           | rep2 | %   | rep1                                 | rep2 | %   | rep1                              | rep2 | %   |
| <i>Igh</i> split ends                | 9         | 13   | 1.4 | 42             | 21   | 4.6 | 86                                   | 47   | 6.2 | 0                                 | 0    | 0   |
| <i>Igh</i> Translocation / Dicentric | 5         | 6    | 0.7 | 30             | 14   | 3.2 | 19                                   | 7    | 1.2 | 0                                 | 0    | 0   |
| Chromosome 12 broken                 | 2         | 1    | 0.2 | 7              | 5    | 0.9 | 13                                   | 19   | 1.5 | 2                                 | 1    | 1.1 |
| Total Chromosomes 12                 | 756       | 818  |     | 806            | 578  |     | 1194                                 | 956  |     | 124                               | 154  |     |

**Table S3. Analysis of the location of the first break. Related to Figures 2 and 3.**

Percentage of first break in  $S_{\mu}$  or  $S_{\gamma 1}$  is calculated by summing the occurrence for each category across all replicates and dividing by the sum of all alleles across replicates where the location of the first break can be determined (Total DSB origin). Unknown refers to *Igh* alleles where break location cannot be determined and its percentage is calculated in comparison to all *Igh* alleles identified with broken ends (Total Split *Igh*). The Total Split *Igh* category is the result of the sum of Total DSB Origin and Unknown categories. The Total *Igh* alleles category refers to the total number of chromosomes 12 analyzed for each replicate.

| <b>WT + DMSO</b>                | rep1 | rep2 | rep3 | rep4 | rep5 | rep6 | rep7 | rep8 | rep9 | %    |      |
|---------------------------------|------|------|------|------|------|------|------|------|------|------|------|
| Break $S_{\mu}$                 | 2    | 8    | 1    | 0    | 0    | 0    | 6    | 0    | 1    | 94.7 |      |
| Break $S_{\gamma 1}$            | 0    | 1    | 0    | 0    | 0    | 0    | 0    | 0    | 0    | 5.3  |      |
| Total DSB Origin                | 2    | 9    | 1    | 0    | 0    | 0    | 6    | 0    | 1    |      |      |
| Unknown                         | 7    | 4    | 0    | 1    | 1    | 0    | 1    | 0    | 2    | 45.7 |      |
| Total Split <i>Igh</i>          | 9    | 13   | 1    | 1    | 1    | 0    | 7    | 0    | 3    |      |      |
| Total <i>Igh</i> alleles        | 756  | 818  | 908  | 372  | 424  | 271  | 1280 | 786  | 2    |      |      |
| <b><i>Atm</i><sup>-/-</sup></b> | rep1 | rep2 |      |      |      |      |      |      |      |      | %    |
| Break $S_{\mu}$                 | 27   | 25   |      |      |      |      |      |      |      |      | 96.3 |
| Break $S_{\gamma 1}$            | 2    | 0    |      |      |      |      |      |      |      |      | 3.7  |
| Total DSB Origin                | 29   | 25   |      |      |      |      |      |      |      |      |      |
| Unknown                         | 11   | 2    |      |      |      |      |      |      |      |      | 19.4 |
| Total Split <i>Igh</i>          | 40   | 27   |      |      |      |      |      |      |      |      |      |
| Total <i>Igh</i> alleles        | 450  | 294  |      |      |      |      |      |      |      |      |      |
| <b>WT + ATMi</b>                | rep1 | rep2 | rep3 | rep4 | rep5 | rep6 | rep7 | rep8 | %    |      |      |
| Break $S_{\mu}$                 | 18   | 11   | 24   | 7    | 9    | 10   | 8    | 0    | 94.6 |      |      |
| Break $S_{\gamma 1}$            | 0    | 0    | 0    | 2    | 1    | 2    | 0    | 0    | 5.4  |      |      |
| Total DSB Origin                | 18   | 11   | 24   | 9    | 10   | 12   | 8    | 0    |      |      |      |
| Unknown                         | 24   | 10   | 17   | 2    | 2    | 1    | 2    | 0    | 38.7 |      |      |
| Total Split <i>Igh</i>          | 42   | 21   | 41   | 11   | 12   | 13   | 10   | 0    |      |      |      |
| Total <i>Igh</i> alleles        | 806  | 578  | 3274 | 494  | 728  | 418  | 732  | 220  |      |      |      |

| <b><i>Trp53bp1</i><sup>-/-</sup></b> | rep1 | rep2 | rep3 | rep4 | rep5 | %    |
|--------------------------------------|------|------|------|------|------|------|
| Break S <sub>μ</sub>                 | 18   | 20   | 7    | 4    | 39   | 46.6 |
| Break S <sub>γ1</sub>                | 41   | 13   | 9    | 4    | 34   | 53.4 |
| Total DSB Origin                     | 59   | 33   | 16   | 8    | 73   |      |
| Unknown                              | 27   | 14   | 10   | 6    | 69   | 40.0 |
| Total Split <i>Igh</i>               | 86   | 47   | 26   | 14   | 142  |      |
| Total <i>Igh</i> alleles             | 1194 | 956  | 946  | 44   | 3972 |      |

| <b>WT+ATMi (LPS)</b>     | rep1 | rep2 | %    |
|--------------------------|------|------|------|
| Break S <sub>μ</sub>     | 16   | 26   | 97.7 |
| Break S <sub>γ1</sub>    | 1    | 0    | 2.3  |
| Total DSB Origin         | 17   | 26   |      |
| Unknown                  | 4    | 10   | 24.6 |
| Total Split <i>Igh</i>   | 21   | 36   |      |
| Total <i>Igh</i> alleles | 352  | 1690 |      |

| <b><i>Trp53bp1</i><sup>-/-</sup> (LPS)</b> | rep1 | rep2 | %    |
|--------------------------------------------|------|------|------|
| Break S <sub>μ</sub>                       | 13   | 13   | 59.1 |
| Break S <sub>γ1</sub>                      | 10   | 8    | 40.9 |
| Total DSB Origin                           | 23   | 21   |      |
| Unknown                                    | 7    | 5    | 21.4 |
| Total Split <i>Igh</i>                     | 30   | 26   |      |
| Total <i>Igh</i> alleles                   | 1456 | 1480 |      |

| <b>CH12 +ATMi</b>        | rep1 | %    |
|--------------------------|------|------|
| Break S <sub>μ</sub>     | 36   | 97.3 |
| Break S <sub>γ1</sub>    | 1    | 2.7  |
| Total DSB Origin         | 37   |      |
| Unknown                  | 5    | 11.9 |
| Total Split <i>Igh</i>   | 42   |      |
| Total <i>Igh</i> alleles | 788  |      |

| <b><i>Nbs1</i><sup>hypo</sup></b> | rep1 | rep2 | %    |
|-----------------------------------|------|------|------|
| Break S <sub>μ</sub>              | 15   | 4    | 82.6 |
| Break S <sub>γ1</sub>             | 4    | 0    | 17.4 |
| Total DSB Origin                  | 19   | 4    |      |
| Unknown                           | 23   | 14   | 61.7 |
| Total Split <i>Igh</i>            | 42   | 18   |      |
| Total <i>Igh</i> alleles          | 2468 | 1330 |      |

| <b><i>H2afx</i><sup>-/-</sup></b>               | rep1 | rep2 | %    |
|-------------------------------------------------|------|------|------|
| Break S <sub>μ</sub>                            | 36   | 13   | 92.5 |
| Break S <sub>γ1</sub>                           | 4    | 0    | 7.5  |
| Total DSB Origin                                | 40   | 13   |      |
| Unknown                                         | 19   | 2    | 28.4 |
| Total Split <i>Igh</i>                          | 59   | 15   |      |
| Total <i>Igh</i> alleles                        | 1422 | 311  |      |
| <b>DNA PKi +ATMi</b>                            | rep1 | rep2 | %    |
| Break S <sub>μ</sub>                            | 14   | 13   | 90.0 |
| Break S <sub>γ1</sub>                           | 1    | 2    | 10.0 |
| Total DSB Origin                                | 15   | 15   |      |
| Unknown                                         | 7    | 17   | 44.4 |
| Total Split <i>Igh</i>                          | 22   | 32   |      |
| Total <i>Igh</i> alleles                        | 648  | 394  |      |
| <b><i>Rif1</i><sup>-/-</sup></b>                | rep1 | rep2 | %    |
| Break S <sub>μ</sub>                            | 43   | 51   | 83.9 |
| Break S <sub>γ1</sub>                           | 7    | 11   | 16.1 |
| Total DSB Origin                                | 50   | 62   |      |
| Unknown                                         | 14   | 19   | 22.8 |
| Total Split <i>Igh</i>                          | 64   | 81   |      |
| Total <i>Igh</i> alleles                        | 3482 | 2966 |      |
| <b><i>Trp53bp1</i><sup>-/-</sup> +<br/>ATMi</b> | rep1 | rep2 | %    |
| Break S <sub>μ</sub>                            | 10   | 11   | 33.9 |
| Break S <sub>γ1</sub>                           | 32   | 9    | 66.1 |
| Total DSB Origin                                | 42   | 20   |      |
| Unknown                                         | 19   | 7    | 29.5 |
| Total Split <i>Igh</i>                          | 61   | 27   |      |
| Total <i>Igh</i> alleles                        | 746  | 542  |      |
| <b><i>53BP1</i><sup>DR</sup></b>                | rep1 | rep2 | %    |
| Break S <sub>μ</sub>                            | 8    | 13   | 53.8 |
| Break S <sub>γ1</sub>                           | 6    | 12   | 46.2 |
| Total DSB Origin                                | 14   | 25   |      |
| Unknown                                         | 11   | 19   | 42.9 |
| Total Split <i>Igh</i>                          | 25   | 45   |      |
| Total <i>Igh</i> alleles                        | 2146 | 1316 |      |

| <b><i>Suv4-20h<sup>dn</sup></i></b>                             | rep1 | rep2 | %     |
|-----------------------------------------------------------------|------|------|-------|
| Break S $\mu$                                                   | 8    | 10   | 100.0 |
| Break S $\gamma$ 1                                              | 0    | 0    | 0.0   |
| Total DSB Origin                                                | 8    | 10   |       |
| Unknown                                                         | 2    | 1    | 14.3  |
| Total Split <i>Igh</i>                                          | 10   | 11   |       |
| Total <i>Igh</i> alleles                                        | 605  | 417  |       |
| <b><i>Suv4-20h1<sup>ff</sup>/h2<sup>+/-</sup></i><br/>+ATMi</b> | rep1 | rep2 | %     |
| Break S $\mu$                                                   | 5    | 7    | 100.0 |
| Break S $\gamma$ 1                                              | 0    | 0    | 0.0   |
| Total DSB Origin                                                | 5    | 7    |       |
| Unknown                                                         | 1    | 1    | 14.3  |
| Total Split <i>Igh</i>                                          | 6    | 8    |       |
| Total <i>Igh</i> alleles                                        | 806  | 600  |       |
